# Supplementary material for: Natural variation at FLM splicing has pleiotropic effects modulating ecological strategies in Arabidopsis thaliana
Source: PubMed Central journal article supplement (PMC7435183; doi:10.1038/s41467-020-17896-w), 2020-08-18
Supplement: 41467_2020_17896_MOESM1_ESM.pdf [file 41467_2020_17896_MOESM1_ESM.pdf]

**Natural variation at *FLM* splicing has pleiotropic effects modulating ecological strategies in *Arabidopsis thaliana***

Hanemian *et al.*

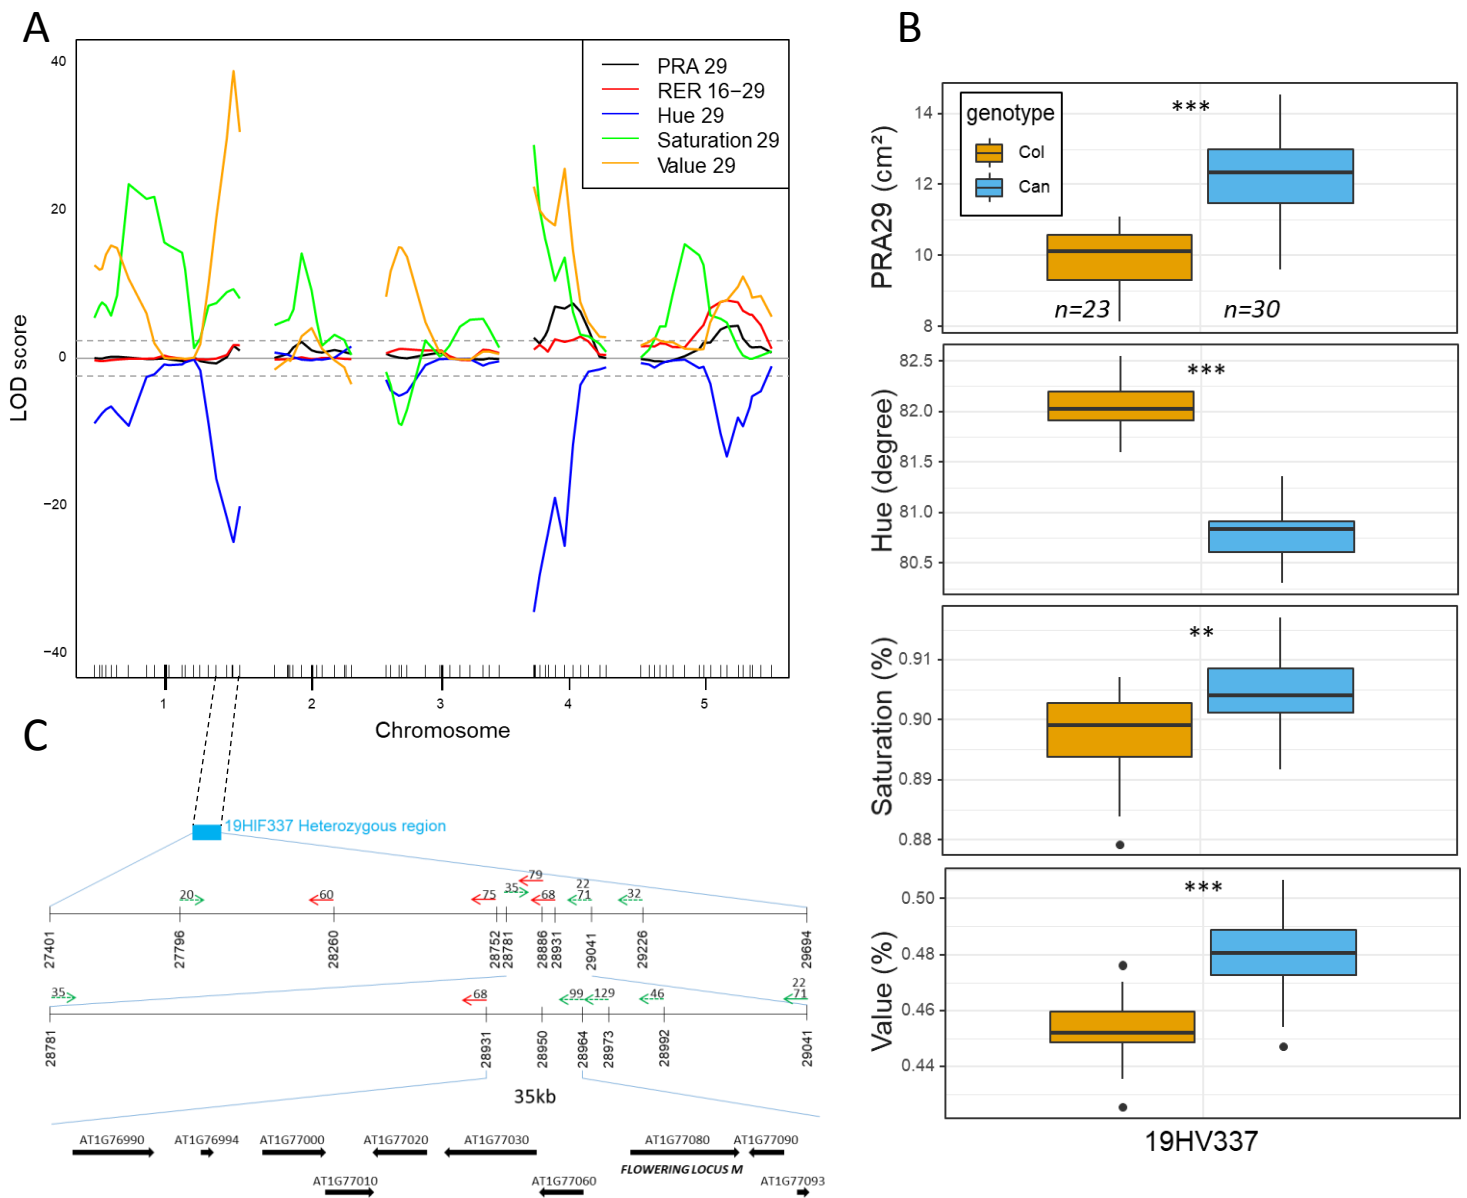

**Supplementary Figure 1. QTL mapping and fine-mapping of the QTLs located at the end of chromosome 1.**

- QTLs from the Can-0 x Col-0 RIL set for 5 traits: Projected Rosette Area 29 days after sowing (PRA29), Relative Expansion Rate from 16 to 29 days after sowing (RER16-29) and average rosette colour expressed in the HSV (Hue, Saturation, Value) scale. Positive or negative LOD score values indicate that the *Can* allele or the *Col* allele increases trait value, respectively. Significance threshold (LOD=2.4) is shown as dotted lines. Raw data are provided in Supplementary Data 5.
- Validation of the QTLs located at the end of chromosome 1 using the heterogeneous inbred family 19HV337 segregating for the region highlighted with the blue rectangle in panel C. The box plots for PRA29, Hue, Saturation and Value show the distribution of the phenotypic data and significance of the genotype effect.
- Analysis of PRA29 segregation in series of recombinants issued from 19HV337[Het] reduced the QTL candidate interval to 35kb. Each arrow is located at the recombination breakpoint of a recombinant HIF line (rHIF). The back of the arrow indicates the fixed (homozygous) region whereas the head points toward the remaining segregating region. Dashed green and filled red colours indicate whether PRA29 is segregating or not in this rHIF, respectively. The thicker black arrows at the bottom represent the candidate genes present in the final 35kb-interval of interest.

Source data underlying Supplementary Figure 1B are provided as a Source Data file.

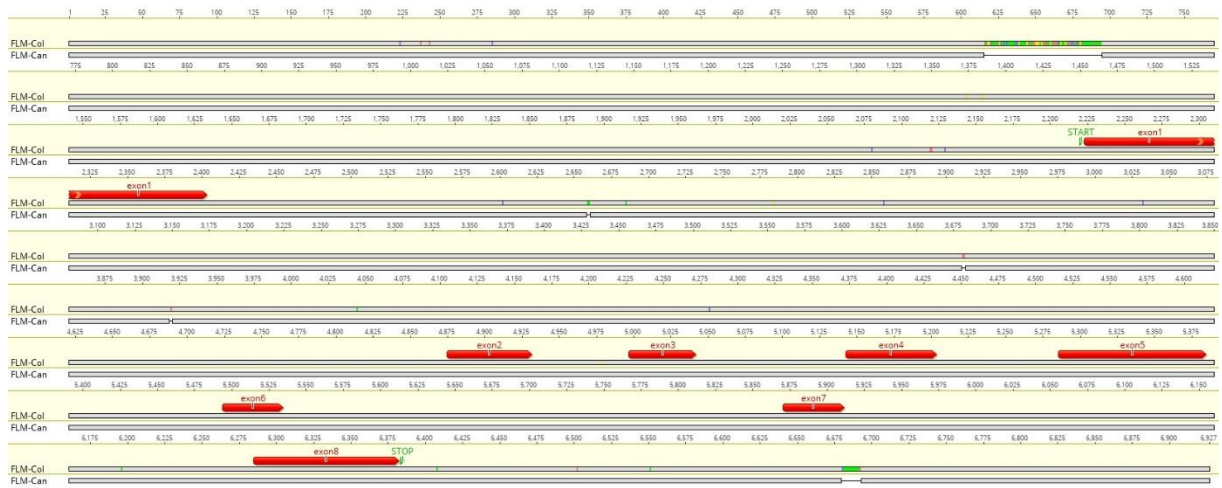

**Supplementary Figure 2. Alignment of the genomic sequences of the *FLM* genes from *Col-0* and *Can-0*.**

The alignment was performed with the Geneious software using the sequence available in Supplementary Data 1. Polymorphisms are highlighted in the top row in which *FLM-Col* is used as a reference. Exons are depicted in red, START and STOP codons in green.

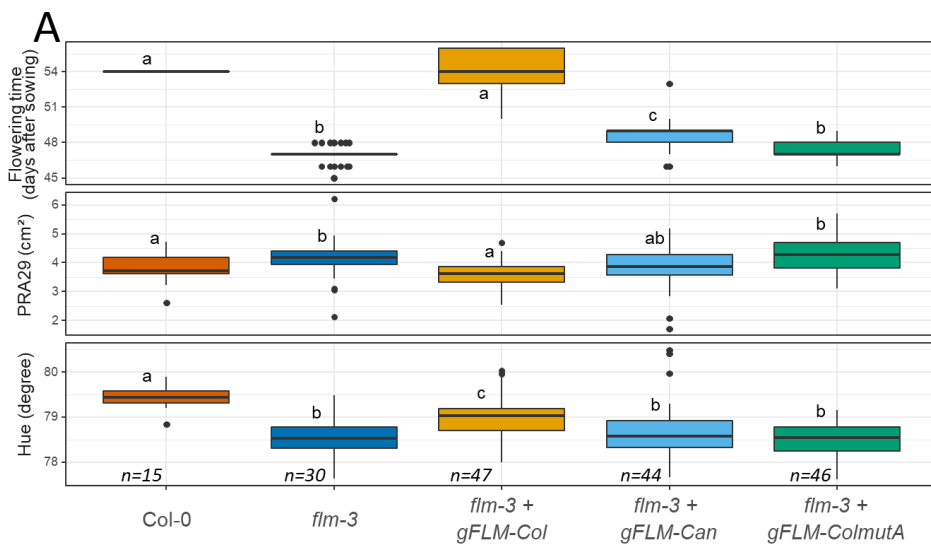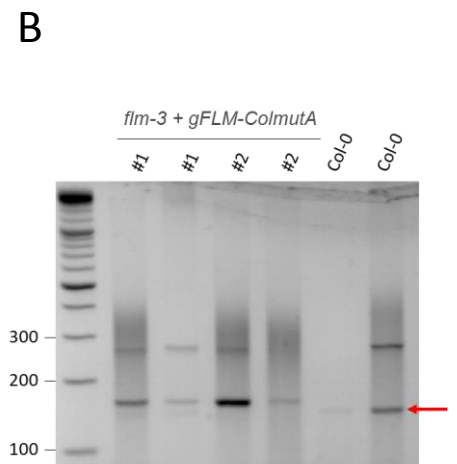

**Supplementary Figure 3. Functional complementation of *flm-3*.**

- A. Different genomic fragments (promoter to 3'UTR) of *FLM* were used to transform the *flm-3* mutant for functional complementation assays: the fragments of Can-0 (*gFLM-Can*), Col-0 (*gFLM-Col*) and Col-0 substituted with SNP28958 (*gFLM-ColmutA*). The data presented here as boxplots for flowering time, PRA29 and Hue were obtained from T2 plants (4 independent lines for *gFLM-Can* and *gFLM-Col*, 2 independent lines for *gFLM-ColmutA*).
- B. Characterization of *exon3*-containing isoforms by PCR using the primer pair qFLM-F3+qFLM-R3d which is spanning 'SNP28958', in 2 individuals of each *gFLM-ColmutA* T2 lines and 2 Col-0 plants as a control. The red arrow indicates the expected size in Col-0. The molecular-weight size marker on the side of the gel is expressed in bp. We repeated this experiment at least twice for each line and we obtained the same results.  
Source data are provided as a Source Data file.

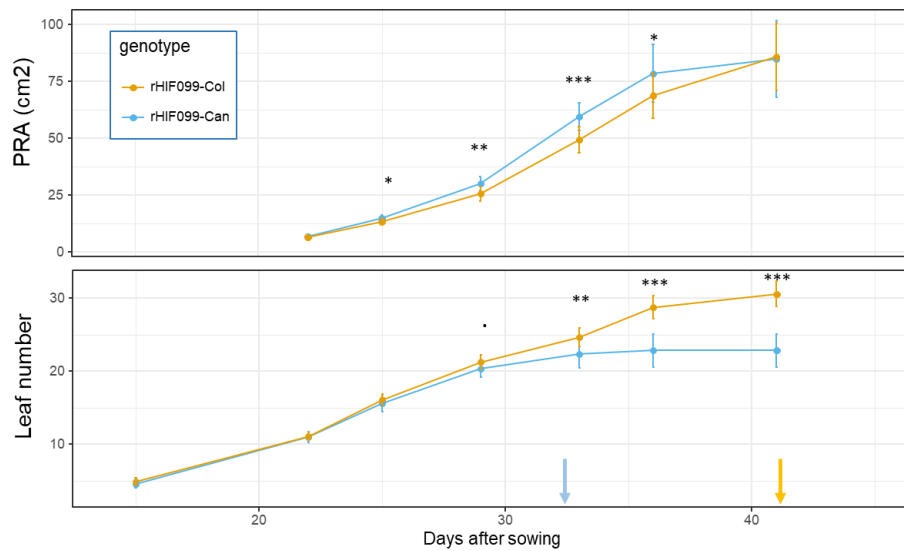

**Supplementary Figure 4. Relationships between vegetative growth and bolting time according to the *FLM* allele.**

Dynamics of projected rosette area (PRA) and leaf number followed until 41 days after sowing. Brown and blue arrow indicate the bolting time (floral stem 1cm) in rHIF099-Can and rHIF099-Col respectively. For each genotype, n=12 individual plants. Data are presented as mean values +/- s.d.. Source data are provided as a Source Data file.

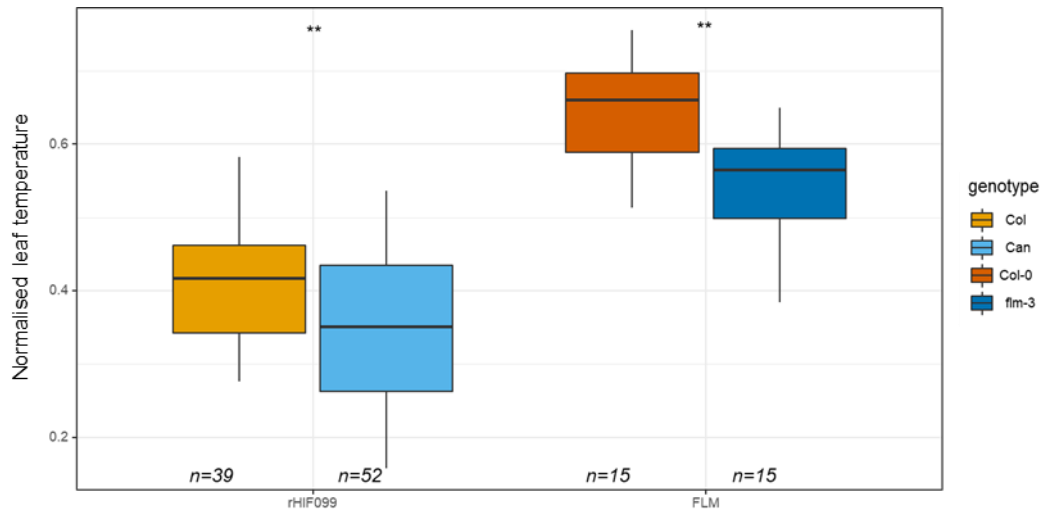

**Supplementary Figure 5. Leaf temperature is affected by the allele at *FLM*.**

The data points presented as boxplots were obtained by normalizing the mean of rosette temperatures with the room temperature. Source data are provided as a Source Data file.

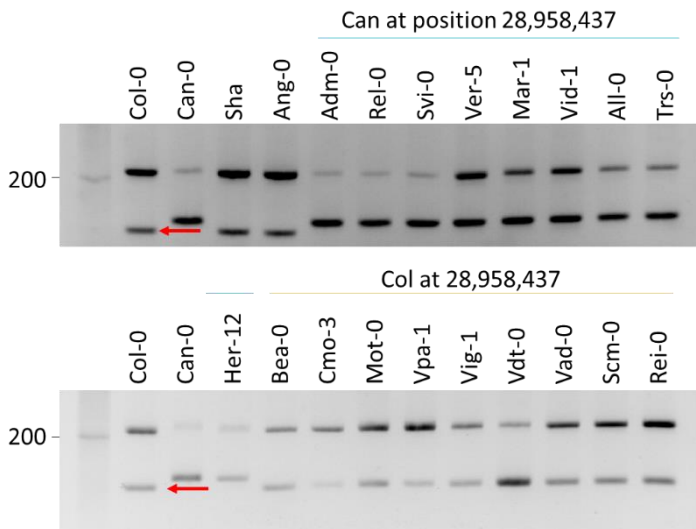

**Supplementary Figure 6. The variant at position 28,958,437bp changes splicing in natural IP strains.**

Characterization of the splicing shift at *exon3* by PCR using the primer pair qFLM-F3+qFLM-R3d on cDNA obtained from a bulk of 12 days-old plantlets grown in vitro from Col-0, Can-0, Sha, Ang-0 and 9 IP strains carrying either the *Can* (blue) or the *Col* (brown) allele at position 28,958,437bp. The red arrows indicate the expected size in Col-0. The molecular-weight size marker on the side of the gel is expressed in bp. We repeated this experiment at least twice for each genotype and we obtained the same results. Source data are provided as a Source Data file.

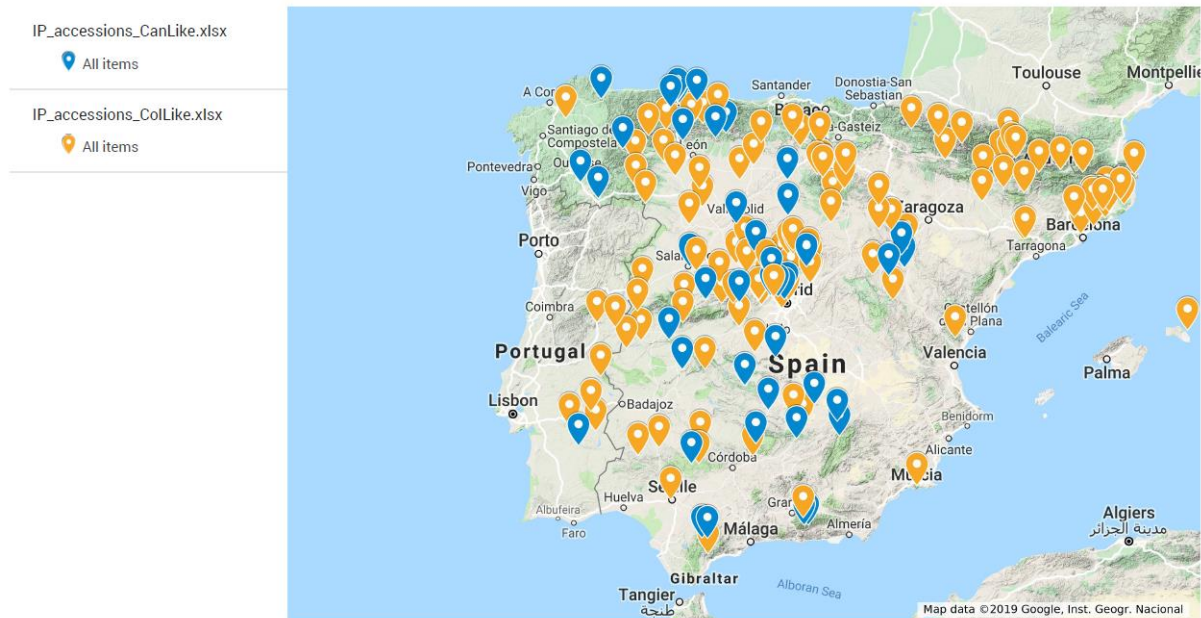

**Supplementary Figure 7. Geographical origin of the IP strains.**

Map obtained from Googlemap showing the location of the IP strains used in this study for the association analyses. Location points are respectively blue or brown according to the *Can* or *Col* genotype at position 28,958,437bp on chromosome 1.



**Supplementary Table 1. Associations between the polymorphism at the position 28,958,437 and phenotypic or climatic variables gathered in Supplementary Data 3.**

| <b>Variable</b> | <b>p-value of FLM Haplotype</b> | <b>Significance level</b> |
|-----------------|---------------------------------|---------------------------|
| OVR             | 0,43                            |                           |
| LN              | 0,14                            |                           |
| FT2011          | 0,25                            |                           |
| LPR             | 0,0071                          | **                        |
| VLN             | 0,051                           | .                         |
| VFT             | 0,1                             |                           |
| VLPR            | 0,0091                          | **                        |
| SLN             | 0,99                            |                           |
| SFT             | 0,64                            |                           |
| Latitude        | 0,69                            |                           |
| Longitude       | 0,053                           | .                         |
| Altitude        | 0,86                            |                           |
| bio1            | 0,53                            |                           |
| bio2            | 0,052                           | .                         |
| bio3            | 0,0017                          | **                        |
| bio4            | 0,62                            |                           |
| bio5            | 0,39                            |                           |
| bio6            | 0,76                            |                           |
| bio7            | 0,48                            |                           |
| bio8            | 0,71                            |                           |
| bio9            | 0,79                            |                           |
| bio10           | 0,63                            |                           |
| bio11           | 0,45                            |                           |
| bio12           | 0,69                            |                           |
| bio13           | 0,91                            |                           |
| bio14           | 0,35                            |                           |
| bio15           | 0,18                            |                           |
| bio16           | 0,91                            |                           |
| bio17           | 0,26                            |                           |
| bio18           | 0,27                            |                           |
| bio19           | 0,97                            |                           |

Model: Y ~ Haplotype + (1| Ecotype.ID), varlist=kinship\_matrix

Significance codes: 0 '\*\*\*' 0.001 '\*\*' 0.01 '\*' 0.05 '.' 0.1 ' ' 1

**Supplementary Table 2. Measurements of physiological traits.**

| genotype | line     | date_t0growth | date_PN    | DM_Leaves (g) | Leaves_area_scan (cm <sup>2</sup> ) | SLA (m <sup>2</sup> .kg-1) | Photo_DM_Leaves (μmolCO <sub>2</sub> .g-1.s-1) | LMA (g.m-2)      | Amass (nmolCO <sub>2</sub> .g-1.s-1) |
|----------|----------|---------------|------------|---------------|-------------------------------------|----------------------------|------------------------------------------------|------------------|--------------------------------------|
| Col-0    | Col_P1   | 9/22/2017     | 10/20/2017 | 0.0435        | 32.88                               | 75.59                      | 0.38223615                                     | 13.2292631300437 | 382.23615                            |
| Col-0    | Col_P1   | 9/25/2017     | 10/23/2017 | 0.0313        | 27.76                               | 88.703                     | 0.50159744                                     | 11.2735758655288 | 501.59744                            |
| Col-0    | Col_P1   | 9/25/2017     | 10/23/2017 | 0.0429        | 31.87                               | 74.293                     | 0.37910574                                     | 13.4602183247412 | 379.10574                            |
| Col-0    | Col_P1   | 9/20/2017     | 10/18/2017 | 0.0505        | 35.66                               | 70.615                     | 0.38046805                                     | 14.1612971748212 | 380.46805                            |
| Col-0    | Col_P1   | 9/18/2017     | 10/16/2017 | 0.0372        | 27.76                               | 74.629                     | 0.44134897                                     | 13.3996167709603 | 441.34897                            |
| Col-0    | Col_P1   | 9/18/2017     | 10/16/2017 | 0.035         | 24.88                               | 71.095                     | 0.46311688                                     | 14.0656867571559 | 463.11688                            |
| Col-0    | Col_P1   | 9/22/2017     | 10/20/2017 | 0.0442        | 33.59                               | 76.001                     | 0.35828877                                     | 13.1577216089262 | 358.28877                            |
| Col-0    | Col_P1   | 9/20/2017     | 10/18/2017 | 0.0332        | 24.63                               | 74.197                     | 0.4745345                                      | 13.4776338665984 | 474.5345                             |
| Col-0    | Col_P2   | 9/18/2017     | 10/16/2017 | 0.0311        | 22.51                               | 72.375                     | 0.47588424                                     | 13.8169257340242 | 475.88424                            |
| Col-0    | Col_P2   | 9/22/2017     | 10/20/2017 | 0.0401        | 29.05                               | 72.438                     | 0.39106779                                     | 13.8049090256495 | 391.06779                            |
| Col-0    | Col_P2   | 9/22/2017     | 10/20/2017 | 0.0366        | 26.62                               | 72.733                     | 0.40784898                                     | 13.7489172727648 | 407.84898                            |
| Col-0    | Col_P2   | 9/25/2017     | 10/23/2017 | 0.0395        | 28.1                                | 71.135                     | 0.39125432                                     | 14.0577774653827 | 391.25432                            |
| Col-0    | Col_P2   | 9/25/2017     | 10/23/2017 | 0.0549        | 41.14                               | 74.94                      | 0.32670972                                     | 13.3440085401655 | 326.70972                            |
| Col-0    | Col_P2   | 9/20/2017     | 10/18/2017 | 0.0531        | 38.14                               | 71.827                     | 0.38614963                                     | 13.922341180893  | 386.14963                            |
| Col-0    | Col_P2   | 9/18/2017     | 10/16/2017 | 0.0373        | 26.52                               | 71.095                     | 0.43504753                                     | 14.0656867571559 | 435.04753                            |
| Col-0    | Col_P2   | 9/20/2017     | 10/18/2017 | 0.048         | 33.65                               | 70.109                     | 0.35755556                                     | 14.2635039723859 | 357.55556                            |
| Col-0    | Col_P3   | 9/22/2017     | 10/20/2017 | 0.0332        | 24.76                               | 74.571                     | 0.46823658                                     | 13.410038755012  | 468.23658                            |
| Col-0    | Col_P3   | 9/18/2017     | 10/16/2017 | 0.0241        | 19.19                               | 79.63                      | 0.53112033                                     | 12.5580811252041 | 531.12033                            |
| Col-0    | Col_P3   | 9/25/2017     | 10/23/2017 | 0.0486        | 34.97                               | 71.953                     | 0.38645716                                     | 13.8979611690965 | 386.45716                            |
| Col-0    | Col_P3   | 9/22/2017     | 10/20/2017 | 0.0413        | 31.74                               | 76.847                     | 0.43363416                                     | 13.0128697281612 | 433.63416                            |
| Col-0    | Col_P3   | 9/20/2017     | 10/18/2017 | 0.0417        | 29.45                               | 70.616                     | 0.42991062                                     | 14.1610966353234 | 429.91062                            |
| Col-0    | Col_P3   | 9/25/2017     | 10/23/2017 | 0.0542        | 39.16                               | 72.253                     | 0.33227105                                     | 13.8402557679266 | 332.27105                            |
| Col-0    | Col_P3   | 9/18/2017     | 10/16/2017 | 0.0354        | 26.47                               | 74.78                      | 0.43990755                                     | 13.3725595078898 | 439.90755                            |
| Col-0    | Col_P3   | 9/20/2017     | 10/18/2017 | 0.0455        | 32.04                               | 70.41                      | 0.43526474                                     | 14.2025280499929 | 435.26474                            |
| Col-0    | Col_P4   | 9/20/2017     | 10/18/2017 | 0.0104        | 8.94                                | 85.965                     | 0.56354895                                     | 11.6326411911825 | 563.54895                            |
| Col-0    | Col_P4   | 9/25/2017     | 10/23/2017 | 0.047         | 34.04                               | 72.422                     | 0.35744681                                     | 13.8079589075143 | 357.44681                            |
| Col-0    | Col_P4   | 9/18/2017     | 10/16/2017 | 0.0287        | 21.76                               | 75.816                     | 0.46309788                                     | 13.1898280046428 | 463.09788                            |
| Col-0    | Col_P4   | 9/20/2017     | 10/18/2017 | 0.0386        | 26.39                               | 68.377                     | 0.44441828                                     | 14.62480073709   | 444.41828                            |
| Col-0    | Col_P4   | 9/18/2017     | 10/16/2017 | 0.0386        | 27.83                               | 72.09                      | 0.4418276                                      | 13.8715494520738 | 441.8276                             |
| Col-0    | Col_P4   | 9/22/2017     | 10/20/2017 | 0.0366        | 30.28                               | 82.725                     | 0.45131644                                     | 12.0882441825325 | 451.31644                            |
| Col-0    | Col_P4   | 9/25/2017     | 10/23/2017 | 0.0406        | 31.11                               | 76.636                     | 0.39565607                                     | 13.0486977399656 | 395.65607                            |
| Col-0    | Col_P4   | 9/22/2017     | 10/20/2017 | 0.0358        | 27.27                               | 76.173                     | 0.45987811                                     | 13.1280112375776 | 459.87811                            |
| flm-3    | flm-3_P1 | 9/25/2017     | 10/23/2017 | 0.0279        | 22.03                               | 78.974                     | 0.52329749                                     | 12.6623952186796 | 523.29749                            |
| flm-3    | flm-3_P1 | 9/18/2017     | 10/16/2017 | 0.0245        | 18                                  | 73.453                     | 0.5038961                                      | 13.6141478224171 | 503.8961                             |
| flm-3    | flm-3_P1 | 9/22/2017     | 10/20/2017 | 0.0288        | 25.05                               | 86.969                     | 0.50031566                                     | 11.4983499867769 | 500.31566                            |
| flm-3    | flm-3_P1 | 9/20/2017     | 10/18/2017 | 0.0375        | 27.36                               | 72.95                      | 0.45672727                                     | 13.7080191912269 | 456.72727                            |
| flm-3    | flm-3_P1 | 9/25/2017     | 10/23/2017 | 0.0427        | 34.02                               | 79.667                     | 0.390462                                       | 12.5522487353609 | 390.462                              |
| flm-3    | flm-3_P1 | 9/18/2017     | 10/16/2017 | 0.0403        | 28.03                               | 69.559                     | 0.41755019                                     | 14.3762848804612 | 417.55019                            |
| flm-3    | flm-3_P1 | 9/20/2017     | 10/18/2017 | 0.0388        | 32.16                               | 82.883                     | 0.42666354                                     | 12.0652003426517 | 426.66354                            |
| flm-3    | flm-3_P1 | 9/22/2017     | 10/20/2017 | 0.0563        | 40.61                               | 72.14                      | 0.34345228                                     | 13.8619351261436 | 343.45228                            |
| flm-3    | flm-3_P2 | 9/22/2017     | 10/20/2017 | 0.0326        | 24.45                               | 75.002                     | 0.47016174                                     | 13.33297787259   | 470.16174                            |

|            |           |           |            |        |       |         |            |                  |           |
|------------|-----------|-----------|------------|--------|-------|---------|------------|------------------|-----------|
| flm-3      | flm-3_P2  | 9/20/2017 | 10/18/2017 | 0.0297 | 27    | 90.896  | 0.59779614 | 11.0015842281289 | 597.79614 |
| flm-3      | flm-3_P2  | 9/25/2017 | 10/23/2017 | 0.0297 | 23.61 | 79.492  | 0.45699418 | 12.5798822523021 | 456.99418 |
| flm-3      | flm-3_P2  | 9/22/2017 | 10/20/2017 | 0.0489 | 36.79 | 75.225  | 0.3508087  | 13.2934529744101 | 350.8087  |
| flm-3      | flm-3_P2  | 9/20/2017 | 10/18/2017 | 0.0374 | 31.27 | 83.607  | 0.4902771  | 11.9607209922614 | 490.2771  |
| flm-3      | flm-3_P2  | 9/18/2017 | 10/16/2017 | 0.0375 | 29.44 | 78.497  | 0.368      | 12.7393403569563 | 368       |
| flm-3      | flm-3_P2  | 9/18/2017 | 10/16/2017 | 0.0366 | 30.76 | 84.042  | 0.45628415 | 11.8988124985126 | 456.28415 |
| flm-3      | flm-3_P2  | 9/25/2017 | 10/23/2017 | 0.0342 | 30.25 | 88.451  | 0.42131845 | 11.3056946784095 | 421.31845 |
| flm-3      | flm-3_P3  | 9/18/2017 | 10/16/2017 | 0.0228 | 16.96 | 74.381  | 0.52472089 | 13.4442935695944 | 524.72089 |
| flm-3      | flm-3_P3  | 9/20/2017 | 10/18/2017 | 0.0389 | 29.76 | 76.516  | 0.43935499 | 13.0691620053322 | 439.35499 |
| flm-3      | flm-3_P3  | 9/25/2017 | 10/23/2017 | 0.039  | 28.25 | 72.43   | 0.41818182 | 13.8064337981499 | 418.18182 |
| flm-3      | flm-3_P3  | 9/25/2017 | 10/23/2017 | 0.0486 | 34.53 | 71.056  | 0.33127572 | 14.07340689034   | 331.27572 |
| flm-3      | flm-3_P3  | 9/18/2017 | 10/16/2017 | 0.0325 | 24.86 | 76.495  | 0.46461538 | 13.0727498529316 | 464.61538 |
| flm-3      | flm-3_P3  | 9/22/2017 | 10/20/2017 | 0.0318 | 25.31 | 79.607  | 0.48684963 | 12.5617093974148 | 486.84963 |
| flm-3      | flm-3_P3  | 9/20/2017 | 10/18/2017 | 0.0467 | 34.28 | 73.401  | 0.42164688 | 13.6237925913816 | 421.64688 |
| flm-3      | flm-3_P3  | 9/22/2017 | 10/20/2017 | 0.0361 | 29.49 | 81.703  | 0.43037018 | 12.2394526516774 | 430.37018 |
| flm-3      | flm-3_P4  | 9/25/2017 | 10/23/2017 | 0.0303 | 23.67 | 78.127  | 0.4950495  | 12.7996723283884 | 495.0495  |
| flm-3      | flm-3_P4  | 9/18/2017 | 10/16/2017 | 0.0383 | 26.51 | 69.204  | 0.43816758 | 14.4500317900699 | 438.16758 |
| flm-3      | flm-3_P4  | 9/22/2017 | 10/20/2017 | 0.0309 | 25.62 | 82.922  | 0.48543689 | 12.0595258194448 | 485.43689 |
| flm-3      | flm-3_P4  | 9/25/2017 | 10/23/2017 | 0.0397 | 27.04 | 68.108  | 0.40141974 | 14.6825629881952 | 401.41974 |
| flm-3      | flm-3_P4  | 9/22/2017 | 10/20/2017 | 0.0372 | 28.72 | 77.192  | 0.36119257 | 12.954710332677  | 361.19257 |
| flm-3      | flm-3_P4  | 9/18/2017 | 10/16/2017 | 0.032  | 22.92 | 71.634  | 0.484375   | 13.9598514671804 | 484.375   |
| flm-3      | flm-3_P4  | 9/20/2017 | 10/18/2017 | 0.0424 | 30.72 | 72.452  | 0.43578473 | 13.802241484017  | 435.78473 |
| flm-3      | flm-3_P4  | 9/20/2017 | 10/18/2017 | 0.0415 | 30.56 | 73.647  | 0.41861993 | 13.5782856056594 | 418.61993 |
| rec099_Can | rec099_10 | 9/22/2017 | 10/20/2017 | 0.034  | 28.55 | 83.975  | 0.49064171 | 11.9083060434653 | 490.64171 |
| rec099_Can | rec099_10 | 9/25/2017 | 10/23/2017 | 0.0466 | 40.63 | 87.189  | 0.35446742 | 11.469336728257  | 354.46742 |
| rec099_Can | rec099_10 | 9/20/2017 | 10/18/2017 | 0.0396 | 33.26 | 83.992  | 0.48243802 | 11.9058957996    | 482.43802 |
| rec099_Can | rec099_10 | 9/22/2017 | 10/20/2017 | 0.03   | 26.64 | 88.787  | 0.53566667 | 11.2629101107144 | 535.66667 |
| rec099_Can | rec099_10 | 9/25/2017 | 10/23/2017 | 0.0419 | 31.83 | 75.964  | 0.40160555 | 13.164130375473  | 401.60555 |
| rec099_Can | rec099_10 | 9/20/2017 | 10/18/2017 | 0.0357 | 29.71 | 83.233  | 0.52559206 | 12.0144654163613 | 525.59206 |
| rec099_Can | rec099_10 | 9/18/2017 | 10/16/2017 | 0.0396 | 30.96 | 78.179  | 0.44605142 | 12.7911587510713 | 446.05142 |
| rec099_Can | rec099_10 | 9/18/2017 | 10/16/2017 | 0.0428 | 32.35 | 75.594  | 0.45433305 | 13.2285631134746 | 454.33305 |
| rec099_Can | rec099_11 | 9/22/2017 | 10/20/2017 | 0.0313 | 27.61 | 88.218  | 0.5634621  | 11.3355551021334 | 563.4621  |
| rec099_Can | rec099_11 | 9/25/2017 | 10/23/2017 | 0.0308 | 31.75 | 103.084 | 0.50708383 | 9.70082651041869 | 507.08383 |
| rec099_Can | rec099_11 | 9/20/2017 | 10/18/2017 | 0.0411 | 32.57 | 79.237  | 0.45963282 | 12.6203667478577 | 459.63282 |
| rec099_Can | rec099_11 | 9/25/2017 | 10/23/2017 | 0.0353 | 31.78 | 90.035  | 0.47437548 | 11.1067918031876 | 474.37548 |
| rec099_Can | rec099_11 | 9/22/2017 | 10/20/2017 | 0.0406 | 33.37 | 82.195  | 0.3929691  | 12.1661901575522 | 392.9691  |
| rec099_Can | rec099_11 | 9/20/2017 | 10/18/2017 | 0.0492 | 37.67 | 76.566  | 0.43717664 | 13.0606274325419 | 437.17664 |
| rec099_Can | rec099_11 | 9/18/2017 | 10/16/2017 | 0.0412 | 32.52 | 78.923  | 0.46910856 | 12.6705776516351 | 469.10856 |
| rec099_Can | rec099_11 | 9/18/2017 | 10/16/2017 | 0.0522 | 38.97 | 74.646  | 0.38714734 | 13.3965651207031 | 387.14734 |
| rec099_Can | rec099_12 | 9/20/2017 | 10/18/2017 | 0.0364 | 31.81 | 87.385  | 0.53296703 | 11.4436116038222 | 532.96703 |
| rec099_Can | rec099_12 | 9/22/2017 | 10/20/2017 | 0.0315 | 26.23 | 83.28   | 0.50995671 | 12.0076849183477 | 509.95671 |
| rec099_Can | rec099_12 | 9/18/2017 | 10/16/2017 | 0.0301 | 25.07 | 83.274  | 0.52129266 | 12.0085500876624 | 521.29266 |
| rec099_Can | rec099_12 | 9/25/2017 | 10/23/2017 | 0.0477 | 36.57 | 76.674  | 0.35201067 | 13.0422307431463 | 352.01067 |
| rec099_Can | rec099_12 | 9/25/2017 | 10/23/2017 | 0.046  | 37.69 | 81.94   | 0.38873518 | 12.2040517451794 | 388.73518 |
| rec099_Can | rec099_12 | 9/22/2017 | 10/20/2017 | 0.0394 | 32.57 | 82.663  | 0.41716659 | 12.0973107678163 | 417.16659 |
| rec099_Can | rec099_12 | 9/18/2017 | 10/16/2017 | 0.0298 | 23.61 | 79.244  | 0.4966443  | 12.6192519307455 | 496.6443  |

|            |           |           |            |        |       |         |            |                  |           |
|------------|-----------|-----------|------------|--------|-------|---------|------------|------------------|-----------|
| rec099_Can | rec099_12 | 9/20/2017 | 10/18/2017 | 0.0368 | 28.88 | 78.486  | 0.50842391 | 12.7411258058762 | 508.42391 |
| rec099_Col | rec099_13 | 9/20/2017 | 10/18/2017 | 0.0483 | 36.25 | 75.06   | 0.42499529 | 13.3226751931788 | 424.99529 |
| rec099_Col | rec099_13 | 9/18/2017 | 10/16/2017 | 0.0241 | 19.84 | 82.321  | 0.49377593 | 12.1475686641319 | 493.77593 |
| rec099_Col | rec099_13 | 9/18/2017 | 10/16/2017 | 0.0437 | 34.24 | 78.351  | 0.43166216 | 12.7630789651696 | 431.66216 |
| rec099_Col | rec099_13 | 9/25/2017 | 10/23/2017 | 0.0389 | 31.53 | 81.063  | 0.42603412 | 12.3360842801278 | 426.03412 |
| rec099_Col | rec099_13 | 9/20/2017 | 10/18/2017 | 0.0333 | 26.77 | 80.393  | 0.50778051 | 12.4388939335514 | 507.78051 |
| rec099_Col | rec099_13 | 9/22/2017 | 10/20/2017 | 0.0362 | 29.34 | 81.049  | 0.51657459 | 12.3382151537959 | 516.57459 |
| rec099_Col | rec099_13 | 9/25/2017 | 10/23/2017 | 0.0493 | 35.99 | 72.995  | 0.38244514 | 13.6995684635934 | 382.44514 |
| rec099_Col | rec099_13 | 9/22/2017 | 10/20/2017 | 0.0494 | 38.62 | 78.174  | 0.35112256 | 12.7919768721058 | 351.12256 |
| rec099_Col | rec099_14 | 9/22/2017 | 10/20/2017 | 0.033  | 26.09 | 79.074  | 0.52699725 | 12.646381870147  | 526.99725 |
| rec099_Col | rec099_14 | 9/25/2017 | 10/23/2017 | 0.0332 | 30.55 | 92.031  | 0.55750274 | 10.8659038802143 | 557.50274 |
| rec099_Col | rec099_14 | 9/25/2017 | 10/23/2017 | 0.0441 | 42.01 | 95.252  | 0.33992991 | 10.4984672237853 | 339.92991 |
| rec099_Col | rec099_14 | 9/22/2017 | 10/20/2017 | 0.0387 | 31.32 | 80.926  | 0.47968053 | 12.3569680943084 | 479.68053 |
| rec099_Col | rec099_14 | 9/18/2017 | 10/16/2017 | 0.0496 | 38.62 | 77.86   | 0.416239   | 12.8435653737478 | 416.239   |
| rec099_Col | rec099_14 | 9/20/2017 | 10/18/2017 | 0.0454 | 41.69 | 91.838  | 0.44603524 | 10.8887388626245 | 446.03524 |
| rec099_Col | rec099_14 | 9/20/2017 | 10/18/2017 | 0.0367 | 29.11 | 79.327  | 0.48228883 | 12.6060483820137 | 482.28883 |
| rec099_Col | rec099_14 | 9/18/2017 | 10/16/2017 | 0.0455 | 34.04 | 74.813  | 0.45234765 | 13.366660874447  | 452.34765 |
| rec099_Col | rec099_15 | 9/20/2017 | 10/18/2017 | 0.0455 | 34.78 | 76.431  | 0.46053946 | 13.0836964059086 | 460.53946 |
| rec099_Col | rec099_15 | 9/25/2017 | 10/23/2017 | 0.051  | 40.6  | 79.612  | 0.30089127 | 12.5609204642516 | 300.89127 |
| rec099_Col | rec099_15 | 9/22/2017 | 10/20/2017 | 0.053  | 39.19 | 73.941  | 0.35608919 | 13.5242963984799 | 356.08919 |
| rec099_Col | rec099_15 | 9/25/2017 | 10/23/2017 | 0.0453 | 31.79 | 70.181  | 0.38571142 | 14.2488707769909 | 385.71142 |
| rec099_Col | rec099_15 | 9/18/2017 | 10/16/2017 | 0.0585 | 43.53 | 74.414  | 0.37622378 | 13.4383314967614 | 376.22378 |
| rec099_Col | rec099_15 | 9/18/2017 | 10/16/2017 | 0.0446 | 30.96 | 69.42   | 0.42376682 | 14.4050705848459 | 423.76682 |
| rec099_Col | rec099_15 | 9/22/2017 | 10/20/2017 | 0.0475 | 35.36 | 74.434  | 0.3554067  | 13.4347206921568 | 355.4067  |
| rec099_Col | rec099_15 | 9/20/2017 | 10/18/2017 | 0.0458 | 38.48 | 84.009  | 0.45533942 | 11.903486531205  | 455.33942 |
| rec099_Col | rec099_1A | 9/25/2017 | 10/23/2017 | 0.0381 | 32.19 | 84.489  | 0.49797184 | 11.8358602895051 | 497.97184 |
| rec099_Col | rec099_1A | 9/22/2017 | 10/20/2017 | 0.0619 | 47.05 | 76.013  | 0.32706712 | 13.1556444292424 | 327.06712 |
| rec099_Col | rec099_1A | 9/18/2017 | 10/16/2017 | 0.0327 | 24.27 | 74.233  | 0.50430915 | 13.4710977597564 | 504.30915 |
| rec099_Col | rec099_1A | 9/18/2017 | 10/16/2017 | 0.0318 | 23.58 | 74.138  | 0.49056604 | 13.4883595457121 | 490.56604 |
| rec099_Col | rec099_1A | 9/20/2017 | 10/18/2017 | 0.0558 | 44.95 | 80.564  | 0.36102965 | 12.4124919318802 | 361.02965 |
| rec099_Col | rec099_1A | 9/25/2017 | 10/23/2017 | 0.0359 | 26.93 | 75.028  | 0.43530008 | 13.3283574132324 | 435.30008 |
| rec099_Col | rec099_1A | 9/20/2017 | 10/18/2017 | 0.0523 | 43.76 | 83.662  | 0.39196941 | 11.9528579283307 | 391.96941 |
| rec099_Col | rec099_1A | 9/22/2017 | 10/20/2017 | 0.0707 | 49.94 | 70.641  | 0.30705928 | 14.1560849931343 | 307.05928 |
| rec099_Can | rec099_1B | 9/25/2017 | 10/23/2017 | 0.0428 | 34.74 | 81.166  | 0.36406117 | 12.3204297365892 | 364.06117 |
| rec099_Can | rec099_1B | 9/18/2017 | 10/16/2017 | 0.0306 | 24.25 | 79.26   | 0.53178847 | 12.6167045167802 | 531.78847 |
| rec099_Can | rec099_1B | 9/18/2017 | 10/16/2017 | 0.0284 | 22.99 | 80.943  | 0.5003201  | 12.3543728302633 | 500.3201  |
| rec099_Can | rec099_1B | 9/22/2017 | 10/20/2017 | 0.0315 | 28.6  | 90.785  | 0.48917749 | 11.0150355234896 | 489.17749 |
| rec099_Can | rec099_1B | 9/22/2017 | 10/20/2017 | 0.0476 | 39.19 | 82.337  | 0.34816654 | 12.1452081081409 | 348.16654 |
| rec099_Can | rec099_1B | 9/25/2017 | 10/23/2017 | 0.0318 | 33.07 | 103.979 | 0.57175529 | 9.61732657555853 | 571.75529 |
| rec099_Can | rec099_1B | 9/20/2017 | 10/18/2017 | 0.0467 | 37.78 | 80.894  | 0.39497761 | 12.3618562563355 | 394.97761 |
| rec099_Can | rec099_1B | 9/20/2017 | 10/18/2017 | 0.0453 | 37.28 | 82.292  | 0.44210315 | 12.1518495114956 | 442.10315 |

date\_t0growth: End of stratification i.e. date at which plants have been transferred to the greenhouse; date\_PN1: Date at which photosynthesis has been measured; DM\_Leaves: Dry mass of the leaf blades; Leaves\_area\_scan: Total leaf area from dissected and scanned rosettes; SLA: Specific leaf area at harvesting [SLA = Leaf area / leaf DM ]; Photo\_DM\_Leaves: Net photosynthetic rate per unit leaf DM [PN raw / Leaf DM]; LMA: Leaf mass per area [1/SLA\*1000]; Amass: Net photosynthetic rate per unit leaf DM [PN raw / Leaf DM\*1000]

**Supplementary Table 3. List of primers used in this study.**

| <b>purpose</b>           | <b>gene/element</b> | <b>primer name</b> | <b>sequence</b>                                            |
|--------------------------|---------------------|--------------------|------------------------------------------------------------|
| gateway cloning          | gFLM                | AttB1-pFLM         | GGGGACAAGTTTGTACAAAAAGCAGGCTctcgaacaagtttttcttctctctaatcga |
| gateway cloning          | gFLM                | AttB2-FLMStop      | GGGGACCACTTTGTACAAGAAAGCTGGGTACCAAAACATGAAACAGAGTTCAAAGCTG |
| PCR-mediated mutagenesis | gFLM                | FLM_hyb-A-F        | TCTGGATGCAGTTTTTGGTGTTA                                    |
| PCR-mediated mutagenesis | gFLM                | FLM_hyb-A-R        | TAACACCAAAAAGTCATCCAGA                                     |
| qPCR                     | PP2A                | qPP2A-F            | TTTGTGAAGCTGTAGGACCG                                       |
| qPCR                     | PP2A                | qPP2A-R            | CGAGTTCAGGGTTTAAATGCG                                      |
| qPCR                     | FLM                 | qFLM-F3            | TCCAAACGACGCAATGGTCTCATCGA                                 |
| qPCR                     | FLM                 | qFLM-R3b           | TTCATAACGATCAATGATCTTGAAATG                                |
| PCR                      | FLM                 | qFLM-R3d           | TCCGGCTTGAACAGCGCTTCTATC                                   |
| pTOPO isoforms cloning   | FLM                 | FLM-cDNA-Fw        | ATGGGAAGAAGAAAAATCGAGAT                                    |
| pTOPO isoforms cloning   | FLM                 | FLM-cDNA-Rev       | CTAATTGAGCAGCGGGAGAGTCT                                    |
